# Supplementary material for: Minimal Residual Disease Detection by Next-Generation Sequencing in Multiple Myeloma: A Comparison With Real-Time Quantitative PCR
Source: Front Oncol. 2021 Jan 29;10:611021. doi: 10.3389/fonc.2020.611021 (PMC7878533; doi:10.3389/fonc.2020.611021)
Supplement: Supplementary Figure 1 — Schematic diagram of clonality detection at diagnosis, sensitivity study, and MRD detection at follow-up, by NGS and Sanger sequencing. [file DataSheet_1.docx]

**Minimal residual disease detection by next-generation sequencing in multiple myeloma: A comparison with real-time quantitative PCR**

Running title: Residual disease detection in myeloma

Qiumei Yao1#, Yinlei Bai2#, Shaji Kuma3, Elaine AU4, Alberto Orfao5, Chor Sang Chim1*

1Department of Medicine, Queen Mary Hospital, The University of Hong Kong, Pokfulam, Hong Kong

2Institute for Immunology and School of Medicine, Tsinghua University, Beijing, China

3 Division of Hematology, Mayo Clinic, Rochester, MN, USA

4Department of Pathology, Queen Mary Hospital, The University of Hong Kong, Pokfulam, Hong Kong

5Department of Medicine and Cytometry Service (Nucleus), Cancer Research Centre (IBMCC, USAL-CSIC) and CIBERONC, Institute for Biomedical Research of Salamanca (IBSAL), University of Salamanca (USAL), Salamanca, Spain

#These authors contributed equally.

*Corresponding author: Prof. Chor Sang CHIM, MD, PhD, Department of Medicine, Queen Mary Hospital, The University of Hong Kong, Pokfulam Road, Pokfulam, Hong Kong

Email: jcschim@hku.hk

Tel: (852) 2255 4769

Fax: (852) 2816 2187

**Table S1. Results of clonality identification by Sanger sequencing and next-generation sequencing.**

| Patient ID | Clonality detected by Sanger sequencing | | |  | Clonality detected by NGS | | | Type of clonal sequence |
| --- | --- | --- | --- | --- | --- | --- | --- | --- |
| Clonal sequence | | PCR |  | V-gene | J-gene | CDR3 identical to Sanger sequencing |
| Clonality done by both Sanger sequencing and NGS | |
| 1 | VH3.9(0)-1-7-(2)D5.12(4)-2-JH6 | | IGH VDJ |  | IGHV3-9_01 | IGHJ6_03 | Yes | Productive |
|  | VH3.13(10)-5-(7)D3.22(10)-11-(1)JH3 | | IGH VDJ |  | IGHV3-13_01 | IGHJ3_02 | Yes | Unproductive |
| 2 | VH2.5(2)-6-(2)D1.26(2)-3-(5)JH4 | | IGH VDJ |  | IGHV2-5_09 | IGHJ4_02 | Yes | Productive |
| 3 | VH3.66(0)-5-(15)D3.16(7)-7-(14)JH6 | | IGH VDJ |  | IGHV3-66_02 | IGHJ6_02 | Yes | Productive |
| 4 | VH3.21(1)-9-(8)D2.21(3)-3-(5)JH6 | | IGH VDJ |  | IGHV3-21_02 | IGHJ6_03 | Yes | Productive |
| 5 | VH1.18(4)-9-(1)D3.10(10)-20-(3)JH4 | | IGH VDJ |  | IGHV1-69_02 | IGHJ4_02 | Yes | Productive |
| 6 | VH3.11(1)-15-(5)D2.21(12)-8-(10)JH6 | | IGH VDJ |  | IGHV3-11_05 | IGHJ6_03 | Yes | Productive |
| 7 | VH3.20(0)-10-(5)D1.26(3)-8-(4)JH4 | | IGH VDJ |  | IGHV3-20_01 | IGHJ4_02 | Yes | Productive |
| 8 | VH1.24(2)-(7)D1.1(1)-12-(17)JH5 | | IGH VDJ |  | IGHV1-24_01 | IGHJ5_02 | Yes | Productive |
| 9 | VH4.61(2)-4-(6)D2.2(12)-20-(8)JH3 | | IGH VDJ |  | IGHV4-61_02 | IGHJ3_02 | Yes | Productive |
| 10 | VH3.66(0)-0-(0)D3.3(21)-12-(3)JH5 | | IGH VDJ |  | IGHV3-66_02 | IGHJ5_02 | Yes | Productive |
| 11 | VH3.23(5)-10-(7)D4.23(0)-5-(8)JH5 | | IGH VDJ |  | IGHV3-23_04 | IGHJ5_02 | Yes | Productive |
| 12 | VH2.5(2)-15-(0)D5.18(3)-2-(11)JH4 | | IGH VDJ |  | IGHV2-5_08 | IGHJ4_02 | Yes | Productive |
| 13 | VH1.18(0)-1-6-(2)D5.24(2)-13-(19)JH6 | | IGH VDJ |  | IGHV1-18_01 | IGHJ6_03 | Yes | Productive |
| 14 | VH4.34(3)-14-(16)D2.2(2)-25-(16)JH4 | | IGH VDJ |  | IGHV3-33_01 | IGHJ3_02 | No | Unproductive (Sanger)  Productive (NGS) |
| 15 | VH5.10(1)-15-(3)D3.22(11)-3-(3)JH4 | | IGH VDJ |  | IGHV5-10_01 | IGHJ4_02 | Yes | Productive |
| 16 | VH1.2(2)-11-(6)D4.11(2)-5-1-(0)JH5 | | IGH VDJ |  | IGHV1-2_02 | IGHJ5_02 | Yes | Productive |
| 17 | VH4.61(2)-4-(1)D4.23(2)-1-(8)JH4 | | IGH VDJ |  | IGHV4-61_01 | IGHJ4_02 | Yes | Productive |
| 18 | VH1.3(2)-8-(0)D6.19(0)-3-(7)JH5 | | IGH VDJ |  | IGHV1-3_01 | IGHJ5_02 | Yes | Productive |
| 19 | VH4.61(4)-8-4-D5.18(7)-11-(6)JH4 | | IGH VDJ |  | IGHV4-61_03 | IGHJ4_02 | Yes | Productive |
| 20 | VH3.30(3)-3-(0)D3.10(9)-4-(3)JH4 | | IGH VDJ |  | IGHV3-30_04 | IGHJ4_02 | Yes | Productive |
| 21 | VH4.4(2)-13-(7)D6.6(0)-3-(1)JH3 | | IGH VDJ |  | IGHV4-4_02 | IGHJ3_01 | Yes | Productive |
| 22 | VH4.39(0)-11-(2)D3.22(9)-8-(10)JH4 | | IGH VDJ |  | IGHV4-39_07 | IGHJ4_02 | Yes | Productive |
| 23 | VH5.51(3)-12-(4)D3.10(9)-4-(8)JH4 | | IGH VDJ |  | IGHV5-51_03 | IGHJ4_02 | Yes | Productive |
| 24 | VH3.23(0)-2-(7)D3.3(12)-0-(5)JH3 | | IGH VDJ |  | IGHV3-23_04 | IGHJ3_01 | Yes | Productive |
| 25 | VH1.68(6)-4-(5)D6.13(2)-11-(14)JH6 | | IGH VDJ |  | IGHV1-68_02 | IGHJ6_02 | Yes | Unproductive |
|  |  | |  |  | IGHV3-20_01 | IGHJ4_02 |  | Productive |
| 26 | VH3.30(2)-7-(2)D3.3(15)-11-(8)JH4 | | IGH VDJ |  | IGHV3-30-3_01 | IGHJ4_02 | Yes | productive |
| 27 | VH3.53(2)-3-(9)D3.9(12)-5-(11)JH6 | | IGH VDJ |  | IGHV3-53_02 | IGHJ6_02 | Yes | Productive |
| 28 | VH4.39 (1)-(7)D5.12(5)-19-(12)JH6 | | IGH VDJ |  | IGHV4-39_07 | IGHJ6_02 | Yes | Productive |
| 29 | VH3.30(0)-4-(8)D5.12(9)-4-(6)JH4 | | IGH VDJ |  | IGHV3-30_04 | IGHJ4_02 | Yes | Productive |
| 30 | VH2.70(5)-9-(12)D3.16(14)-3-(15)JH6 | | IGH VDJ |  | IGHV2-70_12 | IGHJ6_02 | Yes | Productive |
| 31 | D6.25(0)-5-(10)JH4b | | IGH DJ |  | IGKV1-5_03 | IGKJ2_01 | N/A | N/A (Sanger)  Productive (NGS) |
| 32 | D4.17(3)-6-(0)JH4b | | IGH DJ |  | IGKV1-5_03 | IGKJ1_01 | N/A | N/A (Sanger)  Productive (NGS) |
| 33 | D2.2(11)- 12-(6)JH5b | | IGH DJ |  | IGKV3-11_01 | IGKJ4_01 | N/A | N/A (Sanger)  Productive (NGS) |
| 34 | D6.25(3)-18-(11)JH4b | | IGH DJ |  | IGKV2-29_02 | IGKJ4_01 | N/A | N/A (Sanger)  Productive (NGS) |
|  |  | |  |  | IGKV1-6_01 | IGKJ1_01 |  | N/A (Sanger)  Productive (NGS) |
| 35 | D2.2(19)-9-(6)JH4b | | IGH DJ |  | IGKV2D-29_01 | IGKJ2_03 | N/A | N/A (Sanger)  Unproductive (NGS) |
| 36 | D2.2(6)-6-(2)JH5b | | IGH DJ |  | No clonality |  |  |  |
| 37 | D6.25(3)-20-(12)JH4b | | IGH DJ |  | No clonality |  |  |  |
| 38 | D1.26(4)-7-(0)JH3b | | IGH DJ |  | No clonality |  |  |  |
| 39 | D2.2(4)-8-(15)JH6b | | IGH DJ |  | No clonality |  |  |  |
| 40 | D6.13(2)-0-(9)JH4b | | IGH DJ |  | No clonality |  |  |  |
| 41 | D3.9(17)-12-(2)JH5b | | IGH DJ |  | No clonality |  |  |  |
| 42 | D1.26(2)-11-(5)JH5b | | IGH DJ |  | No clonality |  |  |  |
| 43 | VK1.39(1)-2-(8)JK1 | | IGK |  | IGKV1D-39_01 | IGKJ1_01 | Yes | Unproductive |
|  |  | |  |  | IGKV1D-33_01 | IGKJ4_01 |  | Productive |
| 44 | VK1.39(0)-0-(0)JK5 | | IGK |  | IGKV1D-39_01 | IGKJ5_01 | Yes | Productive |
|  |  | |  |  | IGKV1D-33_01 | IGKJ4_02 |  | Unproductive |
| 45 | VK1.39(4)-0-(1)JK1 | | IGK |  | IGKV1D-39_01 | IGKJ1_01 | Yes | Unproductive |
| 46 | VK1.12(1)-0-(2)JK3 | | IGK |  | IGKV3D-20_01 | Kdel | No | NA (Sanger)  N/A (NGS) |
| 47 | VK1.5(8)-6-(2)JK2 | | IGK |  | no clonality |  |  | NA (Sanger) |
| 48 | No clonality | |  |  | No clonality |  |  |  |
| 49 | No clonality | |  |  | No clonality |  |  |  |
| 50 | No clonality | |  |  | No clonality |  |  |  |
| 51 | No clonality | |  |  | No clonality |  |  |  |
| 52 | No clonality | |  |  | No clonality |  |  |  |
| 53 | No clonality | |  |  | No clonality |  |  |  |
| Clonality done by Sanger sequencing only | |
| 54 | VH3.9(1)-5-(2)D6.6-(0)-13-(15)JH6 | | IGH VDJ |  |  |  |  | NA (Sanger) |
| 55 | D2.15(2)-15-(0)JH6 | | IGH DJ |  |  |  |  |  |
| Clonality done by NGS only | |
| 56 |  | |  |  | IGHV3-7_01 | IGHJ4_02 |  | Unproductive |
|  |  | |  |  | IGHV3-64_05 | IGHJ4_02 |  | Productive |
| 57 |  | |  |  | IGHV2-70_01 | IGHJ6_02 |  | Productive |
| 58 |  | |  |  | IGKV4-1_01 | Kdel |  | N/A |
| 59 |  | |  |  | IGHV3-21_02 | IGHJ4_02 |  | Productive |
| 60 |  | |  |  | IGHV3-23_04 | IGHJ6_02 |  | Productive |
| 61 |  | |  |  | IGHV3-74_01 | IGHJ4_02 |  | Productive |
| 62 |  | |  |  | IGHV4-39_01 | IGHJ5_02 |  | Productive |
| 63 |  | |  |  | IGKV2D-40_01 | IGKJ4_01 |  | Unproductive |
| 64 |  | |  |  | IGKV2D-26_01 | Kdel |  | N/A |
| 65 |  | |  |  | IGKV1D-33_01 | IGKJ2_01 |  | Productive |
| 66 |  | |  |  | IGHV4-b_02 | IGHJ4_02 |  | Productive |
| 67 |  | |  |  | IGHV3-48_01 | IGHJ6_02 |  | Productive |
| 68 |  | |  |  | IGKV2D-28_01 | Kdel |  | N/A |
| 69 |  | |  |  | IGHV3-30_07 | IGHJ1_01 |  | Productive |
| 70 |  | |  |  | IGHV2-5_10 | IGHJ4_02 |  | Productive |
|  |  | |  |  | IGHV4-30-4_06 | IGHJ6_03 |  | Unproductive |
| 71 |  | |  |  | IGHV4-59_07 | IGHJ4_02 |  | Productive |
| 72 |  | |  |  | IGHV3-48_03 | IGHJ4_02 |  | Productive |
| 73 |  | |  |  | IGHV4-39_03 | IGHJ5_02 |  | Productive |
| 74 |  | |  |  | IGHV2-26_01 | IGHJ6_02 |  | Productive |
| 75 |  | |  |  | IGHV4-59_01 | IGHJ6_02 |  | Productive |
| 76 |  | |  |  | IGHV3-74_03 | IGHJ4_02 |  | Productive |
| 77 |  | |  |  | IGKV5-2_01 | IGKJ1_01 |  | Unproductive |
| 78 |  | |  |  | IGHV6-1_02 | IGHJ5_02 |  | Productive |
| 79 |  | |  |  | No clonality |  |  |  |
| 80 |  | |  |  | No clonality |  |  |  |

Abbreviations: NGS: next-generation sequencing; Kdel: Kappa deleting element; N/A: not applicable; NA: not available; IGH VDJ: IGH complete VDJ rearrangement; IGH DJ: IGH incomplete DJ rearrangement; IGK: IGK VJ rearrangement in Sanger sequencing, IGK VJ and V-Kdel rearrangement in NGS PCR.

**Table S2. Results of clonality detection by Sanger sequencing in 16 patients who failed clonality identification by next-generation sequencing.**

| Sanger sequencing | Number of patients (n) |
| --- | --- |
| Unsuccessful | 6 |
| Successful | 8 |
| Not assessed | 2 |
| Total | 16 |

**Table S3. Minimal residual disease (MRD) levels measured by next-generation sequencing and allele-specific oligonucleotide real-time quantitative-PCR (ASO RQ-PCR) in follow-up bone marrow samples.**

| Patient ID | Replicate | Sequencing reads (million) | 10-5 control reads | 10-4 control reads (frequency) | MRD reads | Normalized MRD | Mean MRD | ASO RQ-PCR MRD |
| --- | --- | --- | --- | --- | --- | --- | --- | --- |
| 1 (FU1) | -1 | 0.8 | 0 | 13128 (1.5x10-2) | 1737 | 0.0013% | 0.0004% | PNQ<10 |
| -2 | 0.9 | 1279 | 8216 (0.9x10-2) | 0 | 0 |
| -3 | 0.5 | 858 | 9344 (2.0x10-2) | 0 | 0 |
| 1 (FU2) | -1 | 2.0 | 11 | 702 (3.5x10-4) | 1021 | 0.016% | 0.010% | PNQ<50 |
| -2 | 1.2 | 250 | 616 (5.2x10-4) | 807 | 0.013% |
| -3 | 1.7 | 0 | 407 (2.4x10-4) | 141 | 0.003% |
| 2 (FU1) | -1 | 1.2 | 0 | 65 (5.5x10-5) | 0 | 0 | Negative | Negative |
| -2 | 1.0 | 11 | 70 (5.5x10-5) | 0 | 0 |
| -3 | 0.9 | 1 | 43 (4.8x10-5) | 0 | 0 |
| 2 (FU2) | -1 | 1.1 | 0 | 369 (3.4x10-4) | 0 | 0 | Negative | Negative |
| -2 | 0.5 | 5 | 0 | 0 | 0 |
| -3 | 0.8 | 48 | 516 (6.7x10-4) | 0 | 0 |
| 3 | -1 | 1.4 | 185 | 208 (1.4x10-4) | 3547 | 0.17% | 0.082% | PNQ<50 |
| -2 | 2.0 | 8 | 730 (3.7x10-4) | 1962 | 0.027% |
| -3 | 1.1 | 5 | 340 (3.2x10-4) | 1674 | 0.049% |
| 4 | -1 | 2.9 | 99 | 111 (3.8x10-5) | 687 | 0.061% | 0.042% | 30 |
| -2 | 1.3 | 9 | 120 (9.3x10-5) | 280 | 0.023% |
| -3 | 2.1 | 7 | 5 (2.3x10-6) | 311 | N/A |
| 6 | -1 | 1.4 | 298 | 729 (5.1x10-4) | 242 | 0.003% | 0.012% | PNQ<10 |
| -2 | 1.8 | 0 | 612 (3.4x10-4) | 1790 | 0.029% |
| -3 | 1.4 | 856 | 1206 (8.9x10-4) | 562 | 0.005% |
| 7 | -1 | 1.5 | 0 | 601 (4.0x10-4) | 18207 | 0.303% | 0.209% | 128/105cells |
| -2 | 1.3 | 0 | 1399 (1.1x10-3) | 21781 | 0.156% |
| -3 | 1.2 | 144 | 1243 (1.0x10-3) | 20949 | 0.169% |
| 8 | -1 | 1.5 | 184 | 101 (6.7x10-5) | 0 | 0 | Negative | Negative |
| -2 | 1.0 | 0 | 280 (2.9x10-4) | 0 | 0 |
| -3 | 1.2 | 83 | 154 (1.3x10-4) | 0 | 0 |
| 9 | -1 | 0.4 | 0 | 12123 (3.4x10-2) | 8757 | 0.007% | 0.005% | 16/105 cells |
| -2 | 0.4 | 464 | 15234 (4.3x10-2) | 10007 | 0.007% |
| -3 | 0.5 | 2187 | 21140 (4.4x10-2) | 4541 | 0.002% |
| 12 | -1 | 1.2 | 108 | 1500 (1.4x10-3) | 1076 | 0.007% | 0.013% | 12/105 cells |
| -2 | 1.0 | 100 | 569 (0.6x10-3) | 658 | 0.012% |
| -3 | 1.3 | 221 | 579 (0.5x10-3) | 1155 | 0.020% |
| 13 | -1 | 1.7 | 0 | 1548 (1.0x10-3) | 9883 | 0.064% | 0.067% | 122/105 cells |
| -2 | 1.4 | 187 | 1462 (1.0x10-3) | 10616 | 0.073% |
| -3 | 0.8 | 17 | 934 (1.1x10-3) | 6294 | 0.067% |
| 14 | -1 | 1.0 | 54 | 219 (2.3x10-4) | 0 | 0 | Negative | PNQ<10 |
| -2 | 0.9 | 0 | 84 (9.2x10-5) | 0 | 0 |
| -3 | 0.9 | 188 | 149 (1.6x10-4) | 0 | 0 |
| 16 | -1 | 1.2 | 35 | 233 (1.9x10-4) | 20 | 0.0009% | 0.0006% | 75/105 cells |
| -2 | 1.4 | 146 | 346 (2.4x10-4) | 18 | 0.0005% |
| -3 | 1.2 | 0 | 313 (2.6x10-4) | 13 | 0.0005% |
| 17 (FU1) | -1 | 1.3 | 377 | 2125 (1.6x10-3) | 64 | 0.0005% | 0.0005% | PNQ<50 |
| -2 | 1.3 | 72 | 2101 (1.6x10-3) | 82 | 0.0005% |
| -3 | 1.4 | 174 | 6587 (4.6x10-3) | 99 | 0.0005% |
| 17 (FU2) | -1 | 1.1 | 2054 | 6751 (6.1x10-3) | 46 | 0.0005% | 0.0003% | Negative |
| -2 | 1.3 | 1397 | 8120 (6.1x10-3) | 36 | 0.0005% |
| -3 | 1.2 | 1802 | 11728 (9.7x10-3) | 0 | 0 |
| 18 | -1 | 1.3 | 682 | 6827 (1.6x10-3) | 4097 | 0.008% | 0.011% | 503/105 cells |
| -2 | 1.2 | 1224 | 1892 (1.6x10-3) | 4269 | 0.022% |
| -3 | 1.5 | 1695 | 7078 (1.6x10-3) | 4322 | 0.006% |
| 19 | -1 | 1.2 | 47 | 1456 (1.2x10-3) | 3080 | 0.02% | 0.02% | 30/105 cells |
| -2 | 1.2 | 0 | 1129 (0.9x10-3) | 2506 | 0.02% |
| -3 | 1.3 | 0 | 1508 (1.2x10-3) | 2612 | 0.02% |
| 20 | -1 | 1.2 | 177 | 3066 (2.6x10-3) | 0 | 0 | 0.0008% | PNQ<10 |
| -2 | 1.6 | 405 | 7442 (4.6x10-3) | 870 | 0.0012% |
| -3 | 1.2 | 0 | 4085 (3.4x10-3) | 609 | 0.0015% |
| 21 | -1 | 0.9 | 118 | 1632 (1.8x10-3) | 5 | 0.0005% | 0.0005% | 3.6/105 cells |
| -2 | 0.8 | 115 | 979 (1.2x10-3) | 52 | 0.0005% |
| -3 | 1.0 | 0 | 1624 (1.7x10-3) | 21 | 0.0005% |
| 22 | -1 | 1.4 | 0 | 19143 (1.4x10-2) | 44946 | 0.023% | 0.023% | 76/105 cells |
| -2 | 1.2 | 0 | 19897 (1.6x10-2) | 45450 | 0.023% |
| -3 | 1.3 | 10111 | 25462 (1.9x10-2) | 61598 | 0.024% |
| 23 | -1 | 0.7 | 2255 | 6005 (8.5x10-3) | 0 | 0 | Negative | Negative |
| -2 | 1.1 | 2924 | 7490 (6.9x10-3) | 0 | 0 |
| -3 | 1.2 | 826 | 4637 (3.8x10-3) | 0 | 0 |
| 24 | -1 | 1.1 | 2544 | 6263 (6.0x10-3) | 0 | 0 | 0.0029% | PNQ<10 |
| -2 | 1.1 | 1563 | 3695 (3.5x10-3) | 0 | 0 |
| -3 | 0.9 | 0 | 3280 (3.6x10-3) | 2856 | 0.0087% |
| 29 | -1 | 1.2 | 10564 | 28172 (2.4x10-2) | 8882 | 0.0032% | 0.0089% | not done |
| -2 | 1.5 | 4 | 26516 (1.8x10-2) | 53399 | 0.021% |
| -3 | 1.3 | 6350 | 37562 (2.9x10-2) | 12676 | 0.0034% |
| 30 | -1 | 1.1 | 0 | 603 (5.7x10-4) | 3 | 0.0005% | 0.0002% | not done |
| -2 | 1.1 | 0 | 545 (5.1x10-4) | 0 | 0 |
| -3 | 1.5 | 0 | 581 (3.8x10-4) | 0 | 0 |
| 31 | -1 | 1.3 | 8 | 3608 (2.7x10-3) | 5732 | 0.016% | 0.021% | not done |
| -2 | 1.3 | 1673 | 2432 (1.9x10-3) | 4583 | 0.019% |
| -3 | 1.0 | 643 | 1750 (1.7x10-3) | 5122 | 0.029% |
| 32 | -1 | 1.1 | 0 | 229 (2.1x10-4) | 6926 | 0.3% | 0.300% | 184/105 cells |
| -2 | 1.1 | 131 | 281 (2.6x10-4) | 6909 | 0.2% |
| -3 | 1.2 | 0 | 228 (1.9x10-4) | 7945 | 0.3% |
| 34 | -1 | 1.0 | 43 | 167 (1.7x10-4) | 2401 | 0.144% | 0.207% | 1758/105cells |
| -2 | 1.0 | 50 | 66 (6.7x10-5) | 2352 | 0.357% |
| -3 | 0.6 | 57 | 113 (1.8x10-4) | 1349 | 0.119% |
| 43 | -1 | 0.9 | 48 | 79 (8.7x10-5) | 0 | 0 | Negative | not done |
| -2 | 1.1 | 41 | 157 (1.4x10-4) | 0 | 0 |
| -3 | 0.9 | 0 | 70 (7.5x10-5) | 0 | 0 |
| 44 | -1 | 0.9 | 5 | 1819 (2.1x10-3) | 9497 | 0.052% | 0.049% | 129/105cells |
| -2 | 0.7 | 0 | 2742 (3.7x10-3) | 11814 | 0.043% |
| -3 | 1.1 | 0 | 2907 (3.8x10-3) | 15268 | 0.053% |
| 45 | -1 | 1.3 | 35 | 81 (6.1x10-5) | 9595 | 1.2% | 1% | 584/105 cells |
| -2 | 1.7 | 102 | 114 (6.8x10-5) | 11574 | 1.0% |
| -3 | 1.4 | 0 | 128 (9.2x10-5) | 10030 | 0.8% |

Abbreviations: FU: follow-up; PNQ: positive but not quantifiable; N/A: not applicable.

**
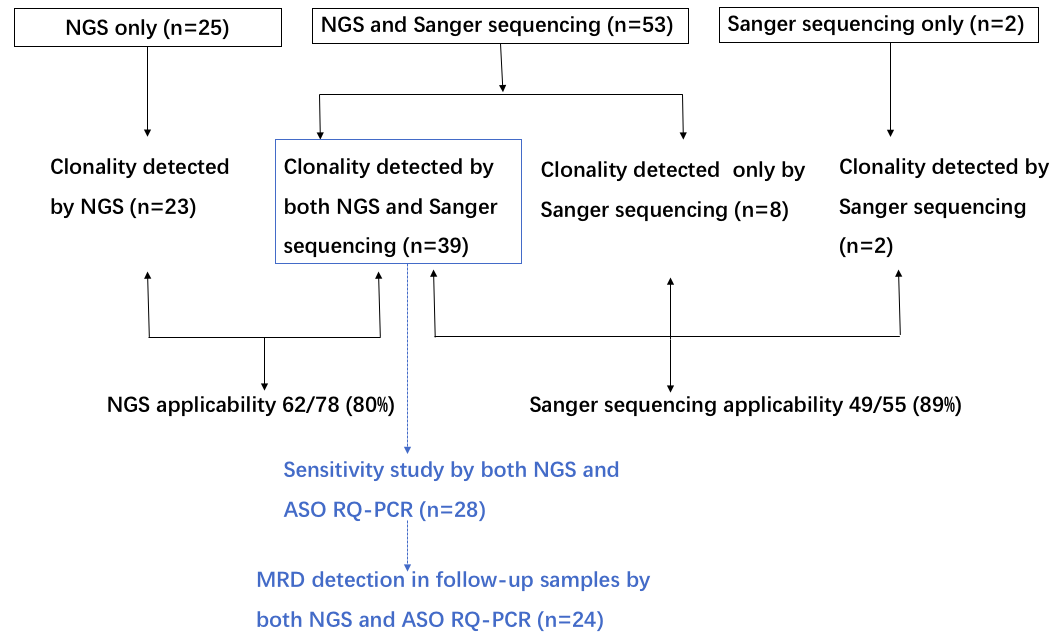
**

**Figure S1. Schematic diagram of clonality detection at diagnosis, sensitivity study and MRD detection at follow-up, by NGS and Sanger sequencing. NGS: next-generation sequencing; ASO RQ-PCR: allele-specific oligonucleotide real-time quantitative-PCR; MRD: minimal residual disease.**


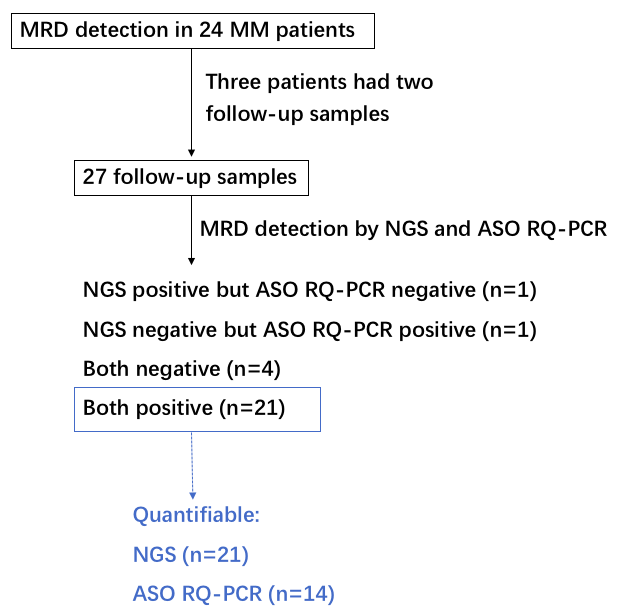


**Figure S2. MRD measured by NGS and ASO RQ-PCR in 27 follow-up bone marrow samples from 24 MM patients. MM: multiple myeloma; NGS: next-generation sequencing; ASO RQ-PCR: allele-specific oligonucleotide real-time quantitative-PCR; MRD: minimal residual disease.**
